# Supplementary material for: REVEAL-MM: Retrospective Evaluation of Variables in Early Assessment and Landmark trends in Multiple Myeloma – a US Claims-Based Case-Control Study
Source: Research Square preprint supplement (doi:10.21203/rs.3.rs-8849252/v1), 2026-02-17
Supplement: Supplementary file 1 [file 652e985910f7d44a63769e1e.xlsx]

## Sheet: Sheet1
Supplementary table 1. Individual codes in claims group
Claim code group description	Claim codes included in the group
Anemias	· DX_D500: Iron deficiency anemia secondary to chronic blood loss
	· DX_D509: Iron deficiency anemia, unspecified
	· DX_D539: Nutritional anemia, unspecified
	· DX_D649: Anemia, unspecified
	· DX_D638: Anemia in other chronic diseases classified elsewhere
Neutropenia	· DX_D709: Neutropenia, unspecified
	· DX_D72819: Decreased white blood cell count, unspecified
Chronic kidney or metabolic disease	· DX_N183: Chronic kidney disease, stage 3 (moderate)
	· DX_N1831: Chronic kidney disease, stage 3A
	· DX_E872: Acidosis
	· DX_R809: Proteinuria, unspecified
	· DX_R810: Long-term insulin use: Long-term current use of insulin
Cardiovascular disorders	· DX_I482: Chronic atrial fibrillation
	· DX_R011: Cardiac murmur, unspecified
Aortic aneurysm	· DX_I712: Thoracic aortic aneurysm without rupture
	· DX_I714: Abdominal aortic aneurysm without rupture
Musculoskeletal pain	· DX_M1990: Unspecified osteoarthritis, unspecified site
	· DX_M545: Low back pain
	· DX_M5450: Low back pain, unspecified
Cough	· DX_R05: Cough
	· DX_R051: Acute cough
	· DX_R059: Cough, unspecified
Shortness of breath	· DX_R0600: Dyspnea, unspecified
	· DX_R0602: Shortness of breath
COVID or viral exposure	· DX_Z20822: Contact with and suspected exposure to COVID-19
	· DX_Z20828: Contact with/exposure to other viral communicable diseases
	· Personal history of COVID-19: Personal history of COVID-19
Other infection concern	· DX_E873: Failure of sterile precautions during procedure
	· DX_Z03818: Encounter for observation for suspected exposure to other biological agents ruled out
COVID vaccination	· GNM_00246: COVID vaccine 23–24 (12+, ANDU), Pfizer
	· GNM_00247: COVID vaccine 23–24 (12+, RAXT), Pfizer
	· GNM_00254: COVID-19 vaccine, tris formulation (Pfizer)
	· GNM_00257: COVID-19 vaccine, mRNA (Moderna)
	· GNM_00258: COVID-19 vaccine, bivalent (Moderna)
Flu vaccination	· GNM_00455: Influenza vaccine, quadrivalent 2020 (65+), MF59C, PF
	· GNM_00457: Influenza vaccine, quadrivalent 2020–21 (65+), PF
	· GNM_00459: Influenza vaccine, quadrivalent 2021 (65+), MF59C, PF
	· GNM_00461: Influenza vaccine, quadrivalent 2021–22 (65+), PF
	· GNM_00463: Influenza vaccine, quadrivalent 2022 (65+), MF59C, PF
	· GNM_00467: Influenza vaccine, quadrivalent 2023 (65+), MF59C, PF
	· GNM_00469: Influenza vaccine, quadrivalent 2023–24 (65+), PF
	· GNM_00474: Influenza vaccine, trivalent 2018–19 (65+), PF
	· GNM_00476: Influenza vaccine, trivalent 2019 (65+), MF59C, PF
	· GNM_00477: Influenza vaccine, trivalent 2019–20 (65+), PF
Pneumococcal vaccination	· GNM_00886: Pneumococcal 13-valent conjugate vaccine
	· GNM_00887: Pneumococcal 20-valent conjugate vaccine
	· GNM_00889: Pneumococcal 23-valent polysaccharide vaccine
Anemia workup	• PROC_83540: Assay of iron
	• PROC_84466: Assay of transferrin
	• PROC_82668: Assay of erythropoietin
	• PROC_83010: Assay of haptoglobin (quantitative)
	• PROC_82746: Assay of folic acid (serum)
	• PROC_85045: Automated reticulocyte count
Bone marrow & cytogenetics	• PROC_38222: Bone marrow biopsy and aspiration
	• PROC_88184: Flow cytometry, 1 marker
	• PROC_88185: Flow cytometry, additional marker
	• PROC_88189: Flow cytometry, 16+ markers
	• PROC_88237: Tissue culture, bone marrow
	• PROC_85097: Bone marrow interpretation
	• PROC_88305: Pathologist tissue exam
	• PROC_88311: Decalcification of tissue
Peripheral blood analysis	• PROC_85007: Blood smear with differential WBC count
	• PROC_85025: Complete CBC with auto differential
	• PROC_85060: Blood smear interpretation
	• PROC_85610: Prothrombin time
	• PROC_85651: RBC sedimentation rate (manual)
	• PROC_85730: Partial thromboplastin time
	• PROC_36415: Venous blood draw/venipuncture
Autoimmune & inflammatory markers	• PROC_86038: Antinuclear antibodies
	• PROC_86431: Rheumatoid factor, quantitative
	• PROC_86160: Complement antigen
B12 testing & supplementation	• PROC_J3420: Injection vitamin B12 (cyanocobalamin), 1,000 mcg
	• PROC_82607: Assay of vitamin B12
Diagnostic/therapeutic infusions	• PROC_J2001: Lidocaine HCl IV infusion, 10 mg
	• PROC_96372: Therapeutic/prophylactic/diagnostic injection, SC/IM
Vaccination administration	• PROC_90471 (your missing code): Pneumococcal vaccine administration
	• PROC_4040F: IIV, no preservative, increased antigen IM
	• PROC_90670: PCV13 vaccine, IM
	• PROC_90677: PCV20 vaccine, IM
	• PROC_90688: IIV4 vaccine, split, 0.5 mL IM
	• PROC_90732: PPSV23 vaccine, ≥2 yrs, SQ/IM
	• PROC_G0008: Influenza vaccine administration
	• PROC_90674: AIIV4, no preservative, 0.5 mL IM
Metabolic panel	• PROC_80053: Comprehensive metabolic panel
	• PROC_83615: LDH enzyme assay
COVID-19 related diagnostics	• PROC_86769: COVID-19 antibody test
	• PROC_U0002: SARS-CoV-2/2019-nCoV detection
	• PROC_C9803: SARS-CoV-2 specimen collection
	• PROC_U0003: COVID-19 RNA amplification
	• PROC_G2023: SARS-CoV-2 specimen collection from any site
	• PROC_U0005: SARS-CoV-2 nucleic acid detection
	• PROC_U0004: Coronavirus/COVID-19 detection, NOS
New patient office visit	• PROC_99202: New, straight-forward, 15 min
	• PROC_99203: New, low complexity, 30 min
	• PROC_99204: New, moderate complexity, 45 min
Established patient office visit	• PROC_99211: Established patient, minimal
	• PROC_99213: Established patient, low complexity, 20 min
	• PROC_99214: Established patient, moderate complexity, 30 min
Observation / short-term hospital care	• PROC_99220: Initial observation care
	• PROC_99217: Observation discharge
Nursing facility / long-term care visits	• PROC_99305: NF care, moderate MDM, 35 min
	• PROC_99308: Subsequent NF care, low MDM, 20 min
	• PROC_99309: Subsequent NF care, moderate MDM, 30 min
Routine monitoring	• PROC_3074F: Systolic BP <130 mm Hg
	• PROC_3078F: Diastolic BP <80 mm Hg
	• PROC_1160F: Review of medications
	• PROC_3075F: Systolic BP 130–139 mm Hg
	• PROC_93000: Electrocardiogram, complete
